# Supplementary material for: Yoga for prenatal depression: a systematic review and meta-analysis
Source: Springer Nature journal article supplement (doi:10.1186/s12888-015-0393-1), 2015-02-04
Supplement: 12888_2015_393_MOESM1_ESM.pdf [file 12888_2015_393_MOESM1_ESM.pdf]

**Table 1** Characteristics of 6 studies included in the meta-analysis.

| Article<br>(publication year) | Country       | Participants<br>(N, diagnosis, age, gestation,<br>cost, percentage of<br>primiparous women in each<br>group) | Exclusion                                                                                                                                                                                                                                                                                                 | Intervention groups<br>(program length, frequency, duration,<br>practice mode) |                                                 | Outcome measures                                                 | Results                                                 |
|-------------------------------|---------------|--------------------------------------------------------------------------------------------------------------|-----------------------------------------------------------------------------------------------------------------------------------------------------------------------------------------------------------------------------------------------------------------------------------------------------------|--------------------------------------------------------------------------------|-------------------------------------------------|------------------------------------------------------------------|---------------------------------------------------------|
|                               |               |                                                                                                              |                                                                                                                                                                                                                                                                                                           | Yoga                                                                           | Control                                         |                                                                  |                                                         |
| Field et al. (2012)           | United States | N=84, 18-40 years old, 18-22 weeks gestation, depressed (CES-D, SCID)                                        | Medical illness, 40 years or older, other psychiatric condition, self-reported drug use or medications that might confound the depression effects<br>Pregnant with more than one child, medical illness, >40 years old, having a co-morbid mental health issue, using drugs (i.e., prescribed or illicit) | 12 weeks, 2 × 20 min/week (postures), in groups (8 women at each session)      | Massage and standard prenatal care              | CES-D                                                            | Significant difference favoring yoga over control group |
| Mitchell et al. (2012)        | United States | N=24, 18-37 years old, 20 weeks gestation, depressed (SCID), be paid \$20 for each session                   | Pregnant with more than one child, medical illness, >40 years old, having a co-morbid mental health issue, using drugs (i.e., prescribed or illicit)                                                                                                                                                      | 12 weeks, 2 × 20 min/week (postures), in groups                                | 12 parenting education sessions                 | CES-D, depressed affect, positive affect, interpersonal distress | Significant difference favoring yoga over control group |
| Field et al. (2013a)          | United States | N=92, 18-37 years old, at an average of 22 weeks gestation, depressed (SCID), be paid \$20 for each session  | Pregnant with more than one child, medical illness, >40 years old, using drugs                                                                                                                                                                                                                            | 12 weeks, 1 × 20 min/week (yoga combined with tai chi), in groups              | Social support group: 12 weeks, 1 × 20 min/week | CES-D                                                            | No significant group difference                         |

|                          |                |                                                                                                                                                             |                                                                                                                                                                                                                               |                                                                                                                                                                                                                                              |                                                                                                                                                                        |                 |                                                         |
|--------------------------|----------------|-------------------------------------------------------------------------------------------------------------------------------------------------------------|-------------------------------------------------------------------------------------------------------------------------------------------------------------------------------------------------------------------------------|----------------------------------------------------------------------------------------------------------------------------------------------------------------------------------------------------------------------------------------------|------------------------------------------------------------------------------------------------------------------------------------------------------------------------|-----------------|---------------------------------------------------------|
| Field et al. (2013b)     | United States  | N=92, 20-38 years old, 22 weeks gestation, depressed (SCID), be paid \$20 for each session                                                                  | Other psychiatric complications conditions, pregnancy medical illness, maternal age older than 40-years-old and younger than 20, illicit drug use                                                                             | 12 weeks, 1 × 20 min/week (postures), in groups                                                                                                                                                                                              | Social support group: 12 weeks, 1 × 20 min/week                                                                                                                        | POMS, CES-D     | No significant group difference                         |
| Satyapriya et al. (2013) | India          | N=96, 20-35 years old, 18-20 weeks gestation, normal pregnancies (not always depressed), 88% in yoga and 87% in control group                               | Associated medical problems (diabetes, hypertension, etc.), multiple pregnancy, IVF pregnancy, previous history of IUGR, maternal physical abnormalities, fetal abnormality on ultrasound scanning, previous exposure to yoga | Integrated yoga: 16 weeks, 1h/d, 15min/10min lectures, 10min/5min breathing exercises, 15min/10min asana postures, 10min/20min pranayama and meditation, 10min/15min deep relaxation, in groups for one month and at home for remaining time | Standard antenatal exercises: 15min/10min lectures, 10min/5min loosening exercises, 15min/10min antenatal exercises, 10min/20min slow walking, 10min/15min supine rest | HADS depression | Significant difference favoring yoga over control group |
| Newham et al. (2014)     | United Kingdom | N=45, >18 years old, healthy women, the second or early third trimester of an uncomplicated, singleton first pregnancy, 100% in both yoga and control group | With a medical illness, taking prescription medication, already practicing antenatal yoga                                                                                                                                     | Integrated yoga: 8 weeks, mild, hatha form of yoga, including exercises, postures, and relaxation/breathing techniques, in groups (10-11 women/group)                                                                                        | TAU: 8 weeks                                                                                                                                                           | EPDS            | Significant difference favoring yoga over control group |

CES-D, Center for Epidemiological Studies Depression Scale; SCID, Structured Clinical Interview for DSM-IV; IVF, In Vitro Fertilization; IUGR, Intrauterine Growth Retardation; TAU, treatment-as-usual; POMS, Profile Of Mood States; HADS, Hospital Anxiety Depression Scale; EPDS, Edinburgh Postnatal Depression Scale.
