# Supplementary material for: Yoga for prenatal depression: a systematic review and meta-analysis
Source: Springer Nature journal article supplement (doi:10.1186/s12888-015-0393-1), 2015-02-04
Supplement: 12888_2015_393_MOESM2_ESM.pdf [file 12888_2015_393_MOESM2_ESM.pdf]

**Table 2** Quality assessment of the studies included.

| <b>Article</b>           | <b>Eligibility criteria specified</b> | <b>Randomization conducted</b> | <b>Allocation concealment</b> | <b>Lost to follow-up Yoga</b> | <b>Lost to follow-up Control</b> | <b>Intension-to-treat analysis</b> | <b>Adequate outcome assessor blinding</b> | <b>Score</b> |
|--------------------------|---------------------------------------|--------------------------------|-------------------------------|-------------------------------|----------------------------------|------------------------------------|-------------------------------------------|--------------|
| Field et al. (2012)      | Yes                                   | Yes                            | Unclear                       | Unclear                       | Unclear                          | Unclear                            | Yes                                       | B            |
| Mitchell et al. (2012)   | Yes                                   | Yes                            | Unclear                       | Unclear                       | Unclear                          | Unclear                            | Unclear                                   | B            |
| Field et al. (2013a)     | Yes                                   | Yes                            | Unclear                       | 9                             | 8                                | Unclear                            | Unclear                                   | B            |
| Field et al. (2013b)     | Yes                                   | Yes                            | Unclear                       | 6                             | 7                                | Unclear                            | Yes                                       | B            |
| Satyapriya et al. (2013) | Yes                                   | Yes                            | Unclear                       | 2                             | 7                                | Unclear                            | Yes                                       | B            |
| Newham et al. (2014)     | Yes                                   | Yes                            | Yes                           | 2                             | 6                                | Unclear                            | Unclear                                   | B            |
